# Supplementary material
Source: publisher figshare collection journal article supplement (https://acs.figshare.com/ndownloader/files/6915158)
Supplement: Supplementary file 1 [file 6915158]

Cpd Number	SMILES	rhLp-PLA2 PED6 IC50 (µM)	rhLp-PLA2 ThioPaf IC50 (µM)	rhPLA2-VIIB IC50 (µM)	Plasma IC50 (µM)
1	CCN(CC)CCN(Cc1ccc(cc1)c2ccc(cc2)C(F)(F)F)C(=O)Cn3c4CCCc4c(=O)nc3SCc5ccc(F)cc5	-	0.000049	0.063	0.035
2	CC(C)COc1cc(=O)n(C)c(=O)n1C	~1000	-	-	-
3	CN1C(=O)NC(=O)C1(C)C	>1000	-	-	-
4	O=S(=O)(NC1CC1)c2cccc(C#N)c2	~1000	-	-	-
5	Fc1ccc(OCCN2C(=O)NC3(CCCCC3)C2=O)cc1	14	-	-	-
6	CN1CC(=O)N(CCOc2ccccc2)C1=O	~1000	-	-	-
7	CN1C(=O)N(CCOc2ccccc2)C(=O)C1(C)C	20	-	-	-
8	CN1C(=O)N(CCOc2ccc(F)cc2)C(=O)C1(C)C	10	-	-	-
9	CC1(C)NC(=O)N(CCOc2ccc(F)cc2)C1=O	44	-	>100	-
10	CC1(C)CN(CCOc2ccc(F)cc2)C(=O)N1	39	-	>100	-
11	CC1(C)CN(CCOc2ccc(F)cc2)C(=O)C1	11	-	>100	-
12	CC1(C)CCC(=O)N(CCOc2ccc(F)cc2)C1	10	-	-	-
13	CC1(C)CN(CCOc2ccc(F)c(C#N)c2)C(=O)C1	3	15	>100	-
(±)-14	Fc1ccc(OCCN2CC(CC2=O)c3ccccc3)cc1C#N	-	0.86	>100	-
(S)-15	C[C@@]1(CN(CCOc2ccc(F)c(C#N)c2)C(=O)C1)c3ccccc3	-	1.6	>100	-
(R)-15	C[C@]1(CN(CCOc2ccc(F)c(C#N)c2)C(=O)C1)c3ccccc3	-	1.0	>100	-
(±)-16	CC(C)C1(C)CN(CCOc2ccc(F)c(C#N)c2)C(=O)C1	-	2.0	>100	-
(S)-16	CC(C)[C@@]1(C)CN(CCOc2ccc(F)c(C#N)c2)C(=O)C1	-	2.3	>100	6.2
(R)-16	CC(C)[C@]1(C)CN(CCOc2ccc(F)c(C#N)c2)C(=O)C1	-	5.4	>100	13
(±)-17	CC(C)C1CN(CCOc2ccc(F)c(C#N)c2)C(=O)C1	-	1.9	>100	-
(±)-18	CC(C)(C)C1CN(CCOc2ccc(F)c(C#N)c2)C(=O)C1	-	0.98	>100	5.1
(±)-19	CC1(CCNCC1)C2CN(CCOc3ccc(F)c(C#N)c3)C(=O)C2	-	0.62	>100	0.87
(±)-20	CC1(CCOCC1)C2CN(CCOc3ccc(F)c(C#N)c3)C(=O)C2	-	0.16	>100	0.26
(±)-21	CC(=O)N1CCC(C)(CC1)C2CN(CCOc3ccc(F)c(C#N)c3)C(=O)C2	-	0.25	>100	0.66
(±)-22	CN1CCC(C)(CC1)C2CN(CCOc3ccc(F)c(C#N)c3)C(=O)C2	-	0.075	>10	0.27
(S)-22	CN1CCC(C)(CC1)[C@H]2CN(CCOc3ccc(F)c(C#N)c3)C(=O)C2	-	0.072	8	0.20
(R)-22	CN1CCC(C)(CC1)[C@@H]2CN(CCOc3ccc(F)c(C#N)c3)C(=O)C2	-	2.7	>100	7.9
(±)-23	CC1(CCS(=O)(=O)CC1)C2CN(CCOc3ccc(F)c(C#N)c3)C(=O)C2	0.063	0.18	>100	0.11
(S)-23	CC1(CCS(=O)(=O)CC1)[C@H]2CN(CCOc3ccc(F)c(C#N)c3)C(=O)C2	0.062	0.12	>100	0.032
(R)-23	CC1(CCS(=O)(=O)CC1)[C@@H]2CN(CCOc3ccc(F)c(C#N)c3)C(=O)C2	-	4.3	>100	6.3
(±)-24	CC1(CCS(=O)(=O)CC1)C2CN(CCOc3ccc(F)c(F)c3)C(=O)C2	-	0.16	>100	0.29
(S)-24	CC1(CCS(=O)(=O)CC1)[C@H]2CN(CCOc3ccc(F)c(F)c3)C(=O)C2	-	0.086	>100	0.10
(±)-25	Fc1ccc(OCCN2CC(CC2=O)C3CCS(=O)(=O)CC3)cc1C#N	-	3.9	>100	7.9
(±)-26	CC1(CCS(=O)(=O)CC1)C2CN(CCOc3ccc(F)cc3)C(=O)C2	-	0.76	>100	1.5
(±)-34	O=C1CC(C(CC2)(C)CCS2(=O)=O)CN1	~300	-	-	-
